# Supplementary material
Source: ML conference proceedings conference paper supplement (https://openreview.net/forum?id=h9t3wUJsHl)
Supplement: supplementary_material [file attachment]

# Tangram-Splatting: Optimizing 3D Gaussian Splatting Through Tangram-inspired Shape Priors

Anonymous Authors

## A ADDITIONAL RESULTS

### A.1 Metrics of Each Scene

To assess the reconstruction quality of each scene, we present the quantization results for scenes from the Mip-NeRF360 dataset [1], the Tanks&Temples dataset [5], and two scenes from the Deep Blending [3], as detailed in Tables 1, 2, 3, 4, 5, and 6. Notably, we mark results sourced from the original paper with †, and those from the 3DGS [4] paper with ‡. The symbol ‘/’ indicates that the data is not provided.

**Table 1: SSIM scores for Mip-NeRF360 scenes. † copied from original paper. ‡ copied from 3DGS paper.**

|              | bicycle      | flowers      | garden       | stump        | treehill     | room         | counter      | kitchen      | bonsai       |
|--------------|--------------|--------------|--------------|--------------|--------------|--------------|--------------|--------------|--------------|
| Plenoxels†   | 0.496        | 0.431        | 0.606        | 0.523        | 0.509        | 0.842        | 0.759        | 0.648        | 0.814        |
| INGP-Base‡   | 0.491        | 0.450        | 0.649        | 0.574        | 0.518        | 0.855        | 0.798        | 0.818        | 0.890        |
| INGP-Big‡    | 0.512        | 0.486        | 0.701        | 0.594        | 0.542        | 0.871        | 0.817        | 0.858        | 0.906        |
| Mip-NeRF360† | 0.685        | 0.583        | 0.813        | 0.744        | 0.632        | 0.913        | 0.894        | 0.920        | 0.941        |
| Mip-NeRF360‡ | 0.685        | 0.584        | 0.809        | 0.745        | 0.631        | 0.910        | 0.892        | 0.917        | 0.938        |
| 3DGS-7k‡     | 0.675        | 0.525        | 0.836        | 0.728        | 0.598        | 0.884        | 0.873        | 0.900        | 0.910        |
| 3DGS-30k‡    | <b>0.771</b> | <b>0.605</b> | <b>0.868</b> | <b>0.775</b> | <b>0.638</b> | <b>0.914</b> | 0.905        | 0.922        | 0.938        |
| GES-40k      | 0.730        | /            | 0.848        | 0.743        | /            | 0.912        | 0.900        | 0.921        | 0.936        |
| Ours         | 0.712        | 0.541        | 0.846        | 0.725        | 0.598        | 0.912        | <b>0.913</b> | <b>0.943</b> | <b>0.950</b> |

**Table 2: PSNR scores for Mip-NeRF360 scenes. † copied from original paper. ‡ copied from 3DGS paper.**

|              | bicycle       | flowers      | garden        | stump         | treehill      | room         | counter      | kitchen      | bonsai       |
|--------------|---------------|--------------|---------------|---------------|---------------|--------------|--------------|--------------|--------------|
| Plenoxels†   | 21.912        | 20.097       | 23.4947       | 20.661        | 22.248        | 27.594       | 23.624       | 23.420       | 24.669       |
| INGP-Base‡   | 22.193        | 20.348       | 24.599        | 23.626        | 22.364        | 29.269       | 26.439       | 28.548       | 30.337       |
| INGP-Big‡    | 22.171        | 20.652       | 25.069        | 23.466        | 22.373        | 29.690       | 26.691       | 29.479       | 30.685       |
| Mip-NeRF360† | 24.37         | <b>21.73</b> | 26.98         | 26.40         | 22.87         | <b>31.63</b> | <b>29.55</b> | <b>32.23</b> | <b>33.46</b> |
| Mip-NeRF360‡ | 24.305        | 21.649       | 26.875        | 26.175        | <b>22.929</b> | 31.467       | 29.447       | 31.989       | 33.397       |
| 3DGS-7k‡     | 23.604        | 20.515       | 26.245        | 25.709        | 22.085        | 28.139       | 26.705       | 28.546       | 28.850       |
| 3DGS-30k‡    | <b>25.246</b> | 21.520       | <b>27.410</b> | <b>26.550</b> | 22.490        | 30.632       | 28.700       | 30.317       | 31.980       |
| GES-40k      | 24.801        | /            | 26.953        | 26.003        | /             | 31.172       | 28.735       | 30.682       | 31.702       |
| Ours         | 24.386        | 20.377       | 26.739        | 25.363        | 22.000        | 30.867       | 29.101       | 31.628       | 32.075       |

**Table 3: LPIPS scores for Mip-NeRF360 scenes. † copied from original paper. ‡ copied from 3DGS paper.**

|              | bicycle      | flowers      | garden       | stump        | treehill     | room         | counter      | kitchen      | bonsai       |
|--------------|--------------|--------------|--------------|--------------|--------------|--------------|--------------|--------------|--------------|
| Plenoxels†   | 0.506        | 0.521        | 0.3864       | 0.503        | 0.540        | 0.4186       | 0.441        | 0.447        | 0.398        |
| INGP-Base‡   | 0.487        | 0.481        | 0.312        | 0.450        | 0.489        | 0.301        | 0.342        | 0.254        | 0.227        |
| INGP-Big‡    | 0.446        | 0.441        | 0.257        | 0.421        | 0.450        | 0.261        | 0.306        | 0.195        | 0.205        |
| Mip-NeRF360† | 0.301        | 0.344        | 0.170        | 0.261        | 0.339        | <b>0.211</b> | 0.204        | 0.127        | 0.176        |
| Mip-NeRF360‡ | 0.305        | 0.346        | 0.171        | 0.265        | 0.347        | 0.213        | 0.207        | 0.128        | 0.179        |
| 3DGS-7k‡     | 0.318        | 0.417        | 0.153        | 0.287        | 0.404        | 0.272        | 0.254        | 0.161        | 0.244        |
| 3DGS-30k‡    | <b>0.205</b> | <b>0.336</b> | <b>0.103</b> | <b>0.210</b> | <b>0.317</b> | 0.220        | 0.204        | 0.129        | 0.205        |
| GES-40k      | 0.267        | /            | 0.137        | 0.262        | /            | 0.235        | 0.216        | 0.135        | 0.217        |
| Ours         | 0.284        | 0.403        | 0.138        | 0.276        | 0.394        | 0.225        | <b>0.123</b> | <b>0.073</b> | <b>0.106</b> |

<sup>1</sup>Additionally, it is important to mention that the results from GES [2] were graciously provided by the authors of GES [2].

**Table 4: SSIM scores for Tanks&Temples and Deep Blending scenes. ‡ copied from 3DGS paper.**

|              | Truck        | Train        | Dr Johnson   | Playroom     |
|--------------|--------------|--------------|--------------|--------------|
| Plenoxels‡   | 0.774        | 0.663        | 0.787        | 0.802        |
| INGP-Base‡   | 0.779        | 0.666        | 0.839        | 0.754        |
| INGP-Big‡    | 0.800        | 0.689        | 0.854        | 0.779        |
| Mip-NeRF360‡ | 0.857        | 0.660        | <b>0.901</b> | 0.900        |
| 3DGS-7k‡     | 0.840        | 0.694        | 0.853        | 0.896        |
| 3DGS-30k‡    | <b>0.879</b> | 0.802        | 0.899        | <b>0.906</b> |
| GES-40k      | 0.875        | <b>0.804</b> | 0.899        | 0.901        |
| Ours         | 0.865        | 0.773        | 0.898        | 0.905        |

**Table 5: PSNR scores for Tanks&Temples and Deep Blending scenes. ‡ copied from 3DGS paper.**

|              | Truck         | Train         | Dr Johnson    | Playroom      |
|--------------|---------------|---------------|---------------|---------------|
| Plenoxels‡   | 23.221        | 18.927        | 23.142        | 22.980        |
| INGP-Base‡   | 23.260        | 20.170        | 27.750        | 19.483        |
| INGP-Big‡    | 23.383        | 20.456        | 28.257        | 21.665        |
| Mip-NeRF360‡ | 24.912        | 19.523        | 29.140        | 29.657        |
| 3DGS-7k‡     | 23.506        | 18.892        | 26.306        | 29.245        |
| 3DGS-30k‡    | 25.187        | 21.097        | 28.766        | <b>30.044</b> |
| GES-40K      | <b>25.233</b> | <b>21.892</b> | <b>29.259</b> | 29.914        |
| Ours         | 24.786        | 21.659        | 29.221        | 29.961        |

**Table 6: LPIPS scores for Tanks&Temples and Deep Blending scenes. ‡ copied from 3DGS paper.**

|              | Truck        | Train        | Dr Johnson   | Playroom     |
|--------------|--------------|--------------|--------------|--------------|
| Plenoxels‡   | 0.335        | 0.422        | 0.521        | 0.499        |
| INGP-Base‡   | 0.274        | 0.386        | 0.381        | 0.465        |
| INGP-Big‡    | 0.249        | 0.360        | 0.352        | 0.428        |
| Mip-NeRF360‡ | 0.159        | 0.354        | <b>0.237</b> | 0.252        |
| 3DGS-7k‡     | 0.209        | 0.350        | 0.343        | 0.291        |
| 3DGS-30k‡    | <b>0.148</b> | <b>0.218</b> | 0.244        | <b>0.241</b> |
| GES-40K      | 0.159        | 0.227        | 0.249        | 0.252        |
| Ours         | 0.163        | 0.272        | 0.253        | 0.252        |

To compare the memory consumption of each scene, we provide the memory cost for scenes from the Mip-NeRF360 dataset [1], the Tanks&Temples dataset [5], and two scenes from Deep Blending [3], detailed in Tables 7 and 8. The memory results of 3DGS [4] were acquired using the models released by the authors on their GitHub repository<sup>2</sup>. The symbol ‘/’ indicates that the data is not provided.

<sup>2</sup><https://github.com/graphdeco-inria/gaussian-splatting>

Table 7: Memory consumption for Mip-NeRF360 scenes.

|          | bicycle  | flowers  | garden   | stump    | treehill | room     | counter  | kitchen  | bonsai   |
|----------|----------|----------|----------|----------|----------|----------|----------|----------|----------|
| 3DGS-7k  | 855.25MB | 582.19MB | 1.01GB   | 900.53MB | 567.59MB | 267.29   | 243.47MB | 398.44MB | 273.68MB |
| 3DGS-30k | 1.42GB   | 860.06MB | 1.35GB   | 1.15GB   | 894.90MB | 376.85MB | 289.24MB | 438.10MB | 294.42MB |
| GES-40k  | 652.42MB | /        | 621.16MB | 554.20MB | /        | 177.77MB | 142.47MB | 191.08MB | 147.37MB |
| Ours     | 462.07MB | 291.64MB | 605.06MB | 524.08MB | 253.27MB | 57.22MB  | 133.79MB | 208.43MB | 149.70MB |

Table 8: Memory consumption for Tanks&Temples and Deep Blending scenes.

|          | Truck    | Train    | Dr Johnson | Playroom |
|----------|----------|----------|------------|----------|
| 3DGS-7k  | 409.73MB | 132.27MB | 449.91MB   | 410.26MB |
| 3DGS-30k | 601.03MB | 242.78MB | 805.36MB   | 602.19MB |
| GES-40k  | 294.75MB | 129.98MB | 470.25MB   | 289.98MB |
| Ours     | 255.95MB | 44.94MB  | 244.31MB   | 228.13MB |

B IMPLEMENTATION DETAILS

Given that some parameters overlap with those in the 3DGS [4] and GES [2] algorithms, we exclusively enumerate the parameters specifically defined by Tangram-Splatting:

- (1) Iterations: The iterations for all scenes are set to 40,000 in our Tangram-Splatting.
- (2) Learning Rates
  - Step ( $v$ ) learning rate: 0.00025
- (3) Intervals
  - Step ( $v$ ) reset interval: 1000
- (4) Iterations of *density and clone* operation on each scene
  - TRAIN, ROOM: 1000
  - TRUCK, BICYCLE, STUMP, KITCHEN, GARDEN, BONSAI, COUNTER, FLOWERS, TREEHILL, PLAYROOM, DR-JOHNSON: 8000
- (5) Initialization of shape ( $\beta$ ) and step ( $v$ ):
  - The shape is initialized to 0.
  - The step is initialized to 2.

The remaining parameters are configured following the GES [2] algorithm. It is noteworthy that the Image Laplacian Parameters in GES [2] are omitted in our Tangram-Splatting.

REFERENCES

[1] Jonathan T Barron, Ben Mildenhall, Dor Verbin, Pratul P Srinivasan, and Peter Hedman. 2022. Mip-nerf 360: Unbounded anti-aliased neural radiance fields. In *Proceedings of the IEEE/CVF Conference on Computer Vision and Pattern Recognition*. 5470–5479.

[2] Abdullah Hamdi, Luke Melas-Kyriazi, Guocheng Qian, Jinjie Mai, Ruoshi Liu, Carl Vondrick, Bernard Ghanem, and Andrea Vedaldi. 2024. GES: Generalized Exponential Splatting for Efficient Radiance Field Rendering. *arXiv preprint arXiv:2402.10128* (2024).

[3] Peter Hedman, Julien Philip, True Price, Jan-Michael Frahm, George Drettakis, and Gabriel Brostow. 2018. Deep blending for free-viewpoint image-based rendering. *ACM Transactions on Graphics (ToG)* 37, 6 (2018), 1–15.

[4] Bernhard Kerbl, Georgios Kopanas, Thomas Leimkühler, and George Drettakis. 2023. 3D gaussian splatting for real-time radiance field rendering. *ACM Transactions on Graphics* 42, 4 (2023), 1–14.

[5] Arno Knapitsch, Jaesik Park, Qian-Yi Zhou, and Vladlen Koltun. 2017. Tanks and temples: Benchmarking large-scale scene reconstruction. *ACM Transactions on Graphics (ToG)* 36, 4 (2017), 1–13.
